# Supplementary material
Source: PubMed Central journal article supplement (PMC4311193)
Supplement: supp_tpc.114.128322_tpc128322_SupplementalDataRev.pdf [file supp_tpc.114.128322_tpc128322_SupplementalDataRev.pdf]

## Control

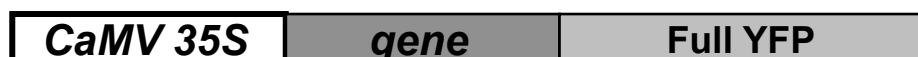

## Test

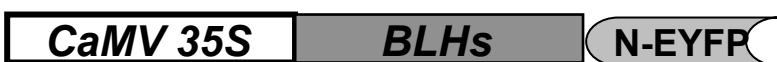

+

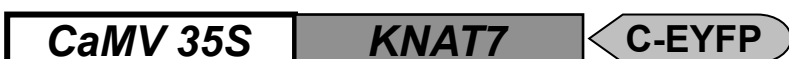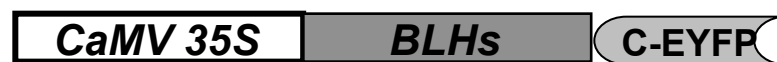

+

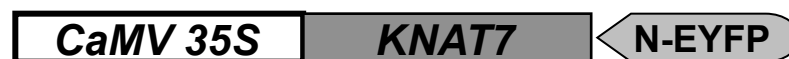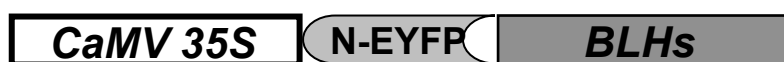

+

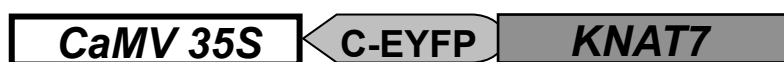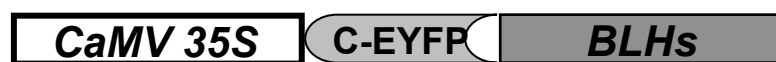

+

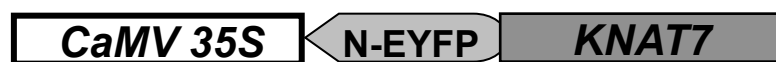

**Supplemental Figure 1.** Schematic diagrams of fusion proteins used for Bimolecular Fluorescence Complementation (BiFC).

All fusions were placed under control of the cauliflower mosaic virus (CaMV) 35S promoter. Fusions of *KNAT7* and *BLH6* to full EYFP were used as controls. The *BLH1*, *BLH5*, *BLH6*, *BLH7*, *BLH10* and *ATH1* coding regions were fused to N-EYFP or C-EYFP, while *KNAT7* was fused to C-EYFP or N-EYFP; both N-terminal and C-terminal fusions of *BLHs* and *KNAT7* were tested. "+" indicates plasmids that were co-transformed into *Arabidopsis* mesophyll protoplasts.

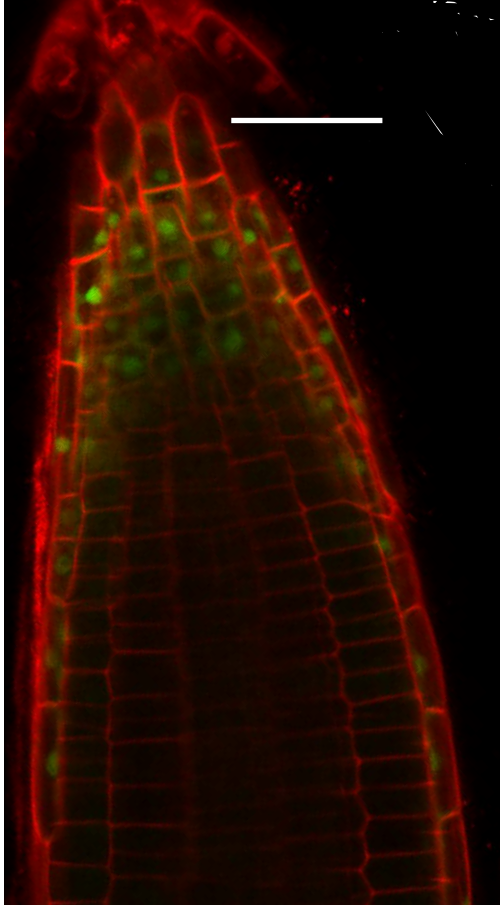

**Supplemental Figure 2.** BLH6 nuclear localization in transgenic lines expressing Pro35S:GFP:BLH6. Longitudinal view of 6-day-old root meristems from a representative line expressing Pro35S:GFP:BLH6. Bar, 50  $\mu$ m.

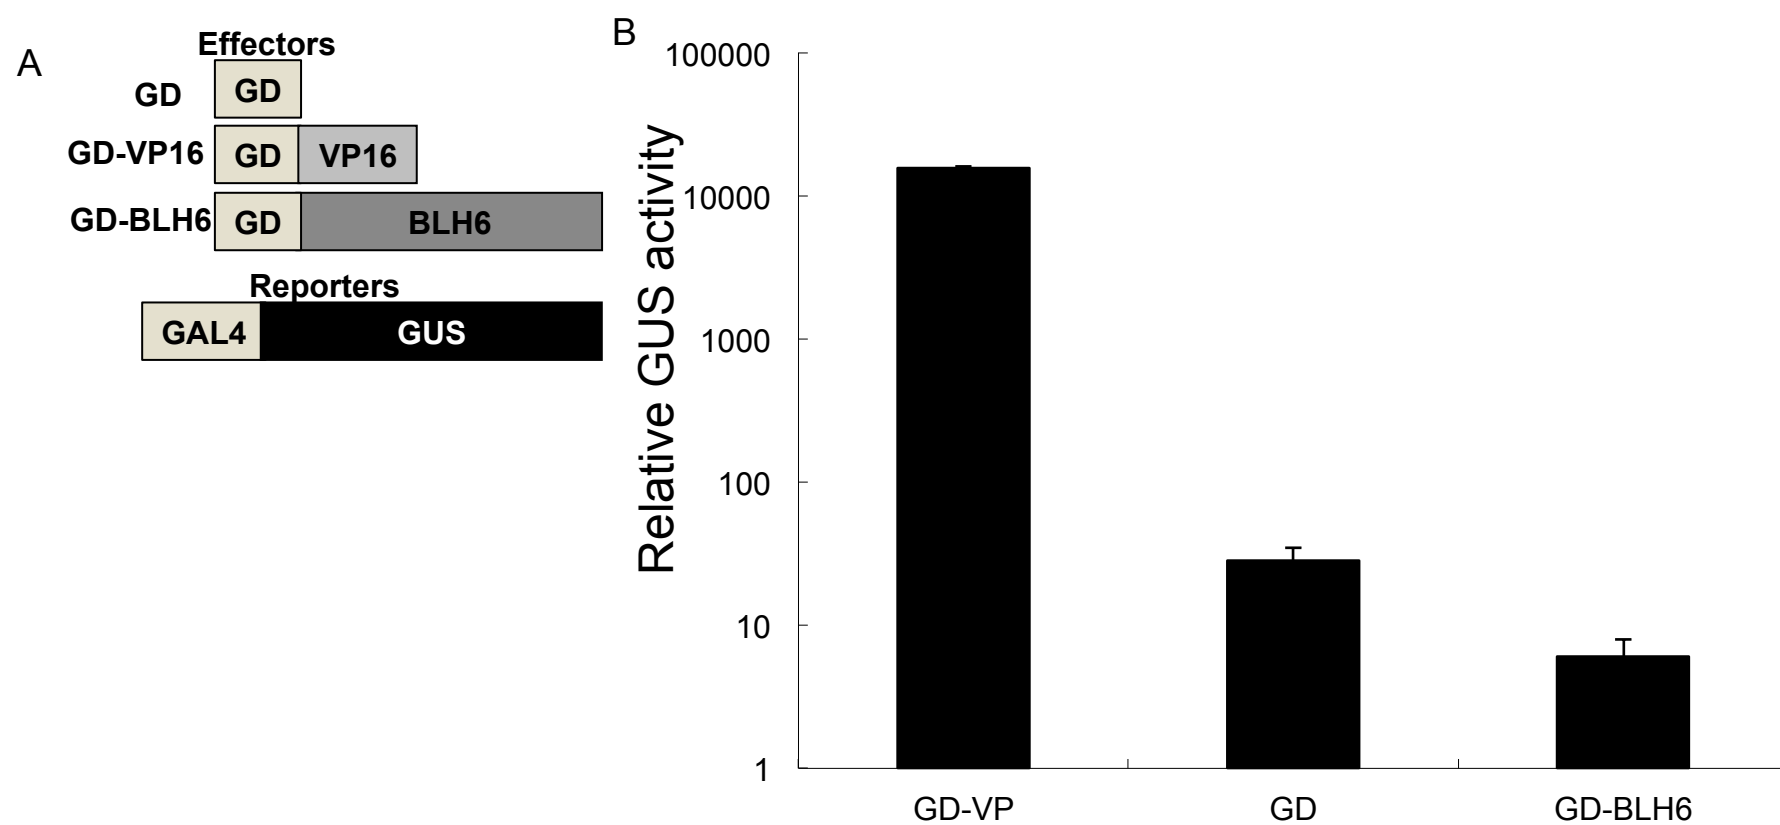

**Supplemental Figure 3. Test of the transcriptional activity of BLH6**

(A) Effectors and reporter constructs used in the transfection assays.

(B) GUS activity in protoplasts derived from Arabidopsis rosette leaves co-transfected with one of three effector plasmids (GD-VP16, GD alone or GD-BLH6) together with the reporter GAL4: GUS in the absence of transactivator. The GUS Activity of GD-VP16 was used to normalize the other two. Error bars represent the standard deviations of nine replicate transfections. In some cases, error bars are not visible because of the small size of the error bars.

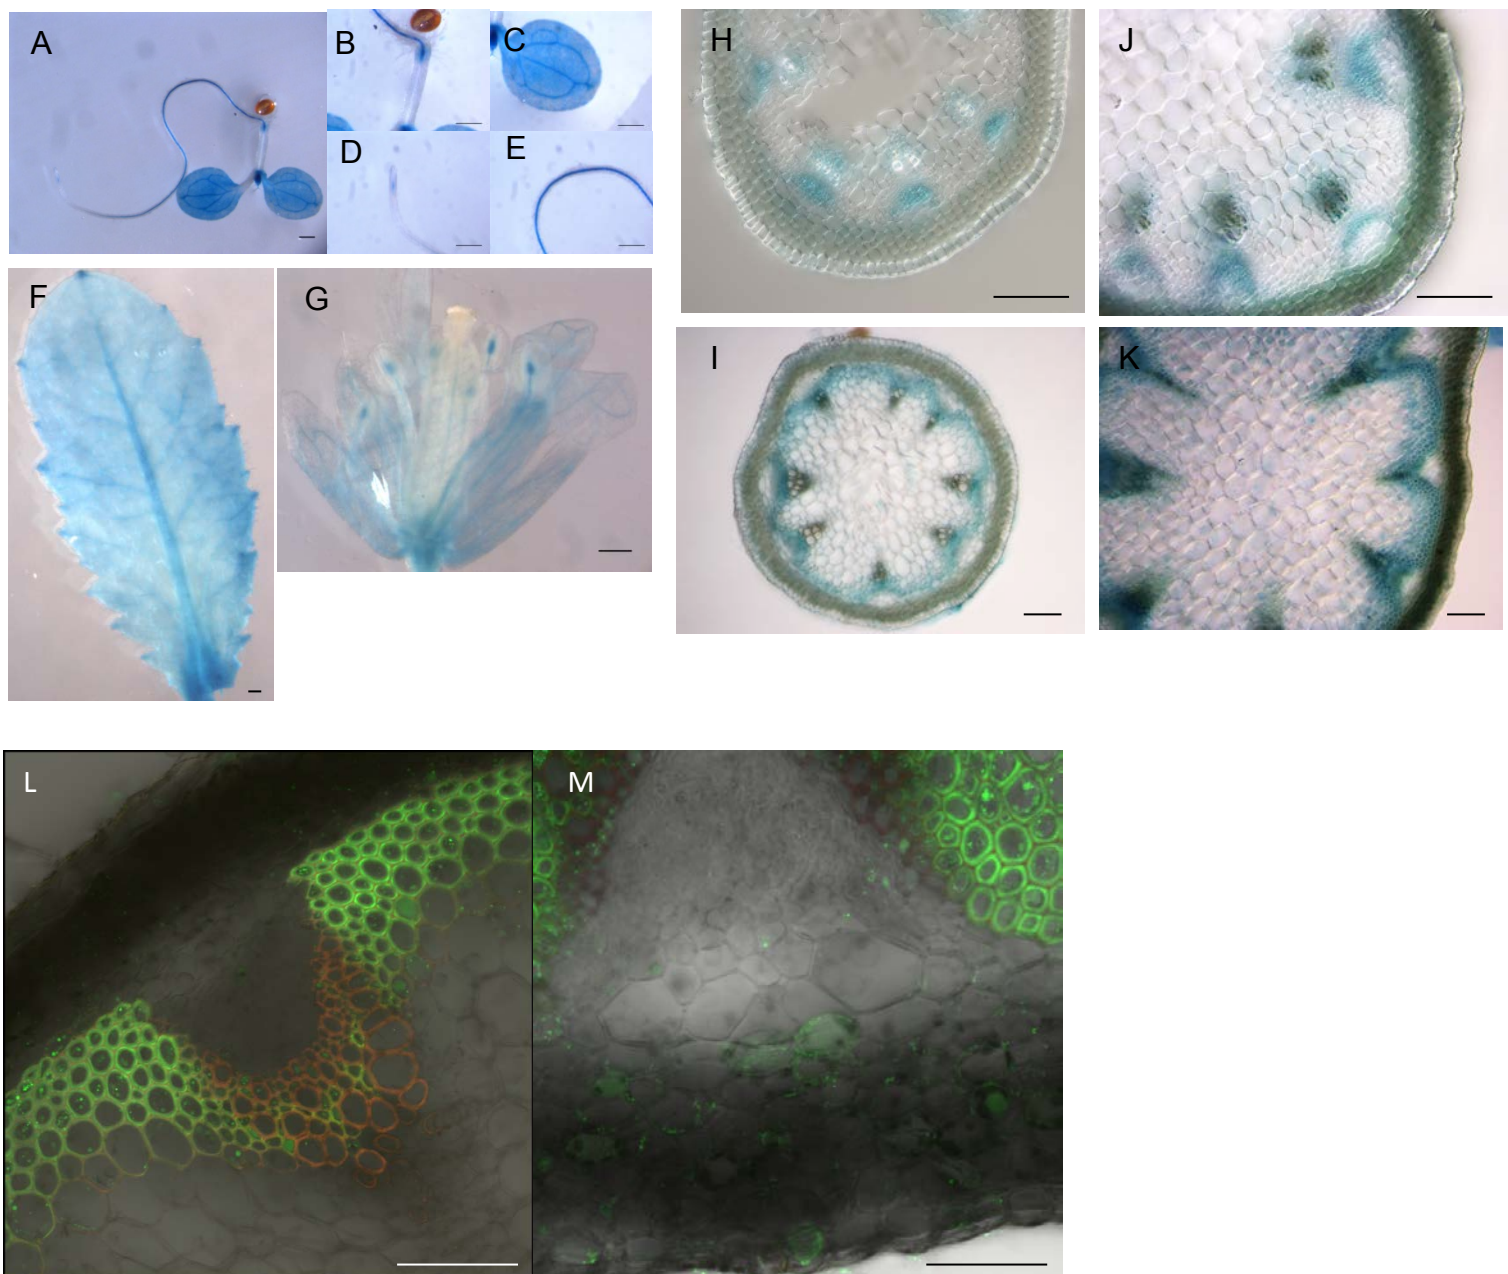

**Supplemental Figure 4.** Histochemical localization of *BLH6* and *KNAT7* promoter activity GUS activity in transgenic *Arabidopsis* lines expressing ProBLH6:GUS was assayed using X-GLUC. Results from representative lines are shown.

(A) 6-day-old whole seedling

(B) Close-up view of hypocotyl

(C) Cotyledon of 6-day-old seedling

(D) Root tip

(E) Close-up view of root showing expression in the stele

(F) Mature leaves

(G) Flower

(H-J) Hand cross section of inflorescence stem taken from elongating internodes (H, J) and non-elongating internode (I, K) of 6-week-old plants expressing ProBLH6:GUS (H, I) and ProKNAT7:KNAT7-GUS (J, K).

(L, M) Fluorescence image of cross-section from 5cm of the bottom of inflorescence stem of a 6-week-old plant expressing *ProKNAT7:GFP*. Interfascicular fiber, developing xylem and cortex cells are expressing *ProKNAT7:GFP*. Autofluorescence from lignin was given the red color.

Bars, A-G= 400  $\mu$ m; H-M=100  $\mu$ m.

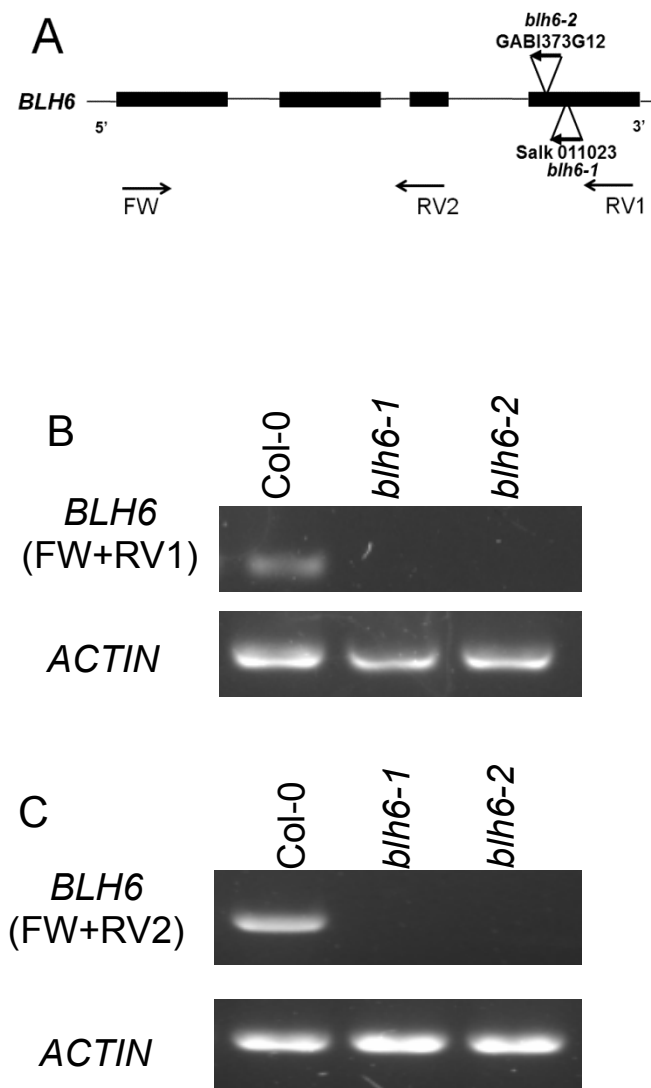

**Supplemental Figure 5.** Schematic diagram of *BLH6* gene structure and the position of T-DNA insertions

(A) *BLH6* gene model with black boxes representing exons and the 5' to 3' orientation shown. Locations of T-DNA insertions in *blh6-1* (SALK-011023) and *blh6-2* (GABI1373G12) alleles are shown. Locations of primers used to assay *BLH6* expression in the mutant backgrounds are shown by arrows below the exons.

(B) Quantitative reverse transcription-polymerase chain reaction (RT-PCR) analysis of *BLH6* expression using primers FW and RV1 in the wild-type (Col-0), *blh6-1* and *blh6-2*. No transcript was detected in the *blh6-1* and *blh6-2* mutants. *ACTIN2* was used as a positive control.

(C) Quantitative RT-PCR using primers FW and RV2 for amplifying the first three exons by the primers of FW and RV2 showed that *BLH6* mRNA was undetectable in the *blh6-1* and *blh6-2* mutants. *ACTIN2* was used as a positive control.



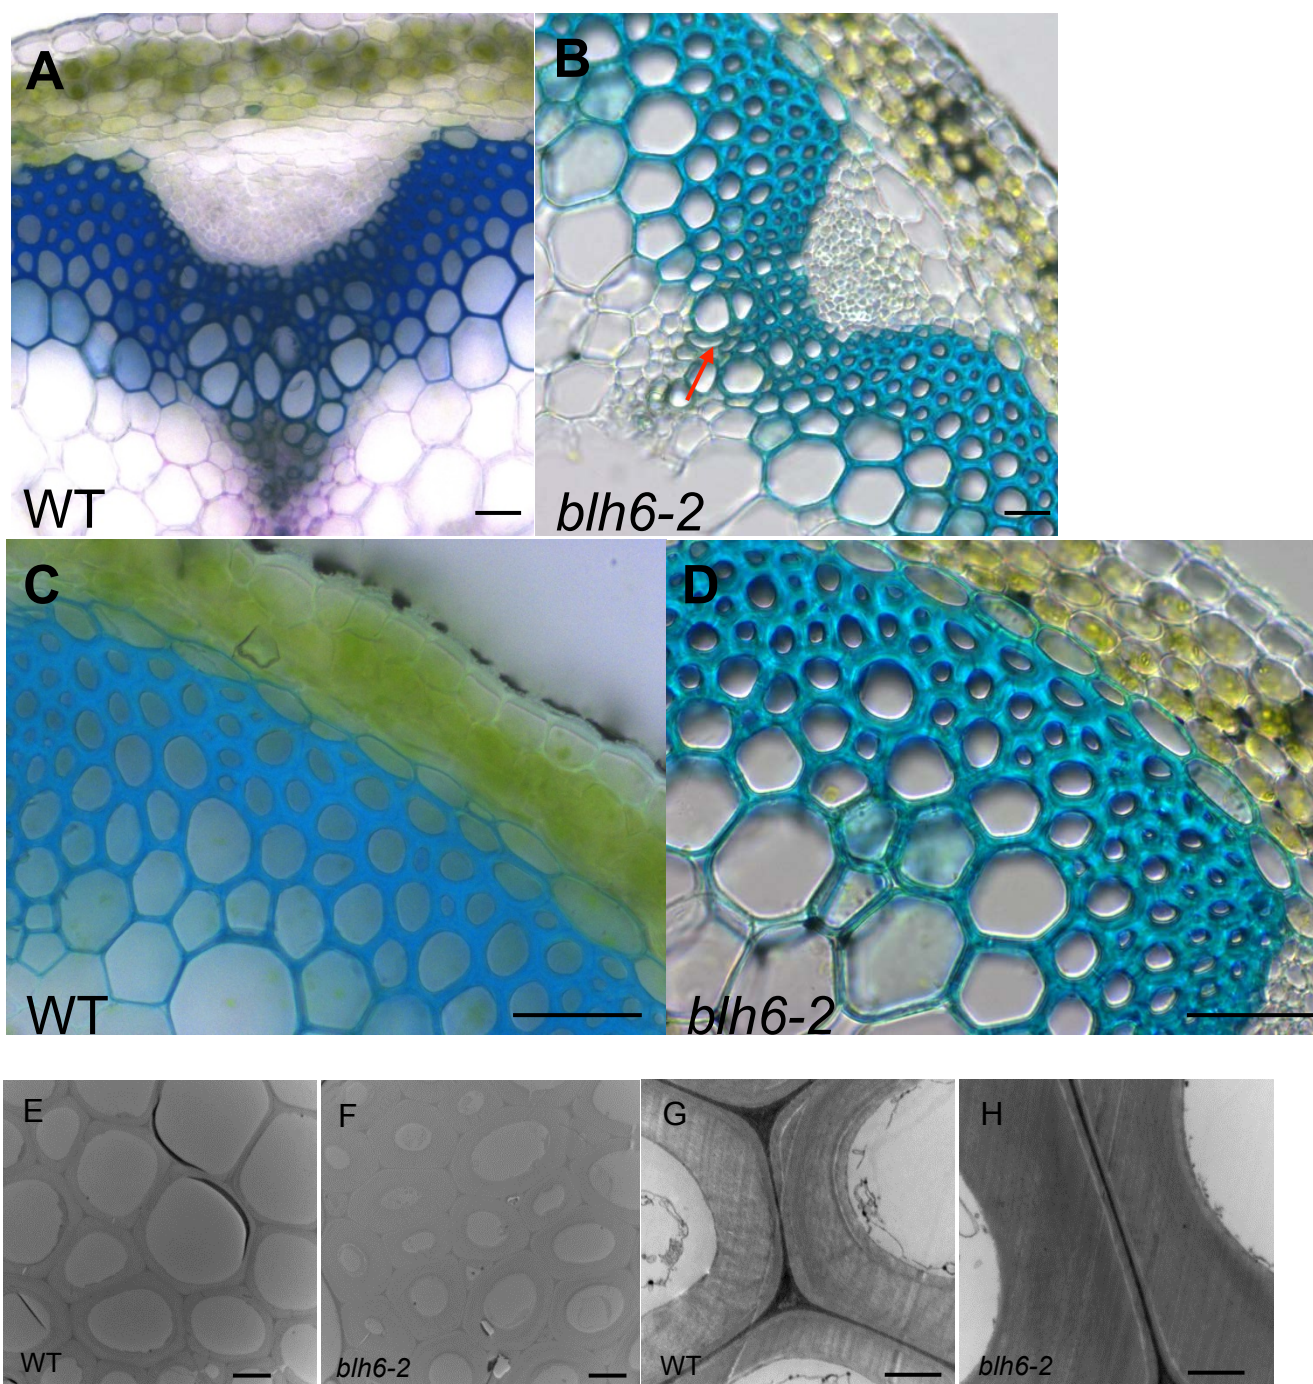

**Supplemental Figure 6.** Anatomy of the vascular bundles and interfascicular regions of wild type and *blh6-2* inflorescence stems.

(A-D) Stem cross sections were taken from the bases of the inflorescence stems of 6-week-old plants and stained with toluidine blue and examined for alterations in secondary wall thickness. (A, C) WT (B, D) *blh6-2*. Bars, 30  $\mu\text{m}$ . Arrow indicates the *irx* vessels.

(E-H) Transmission electron microscopy of WT and *blh6-2* interfascicular fiber secondary walls. (E, G) WT; (F, H) *blh6-2*.

Bars, 10  $\mu\text{m}$  (E, F); 2  $\mu\text{m}$  (G,H).

(A, B) Cross section showing vascular bundles and interfascicular fiber regions.

(C- H) Cross section interfascicular showing fiber regions at higher magnification.

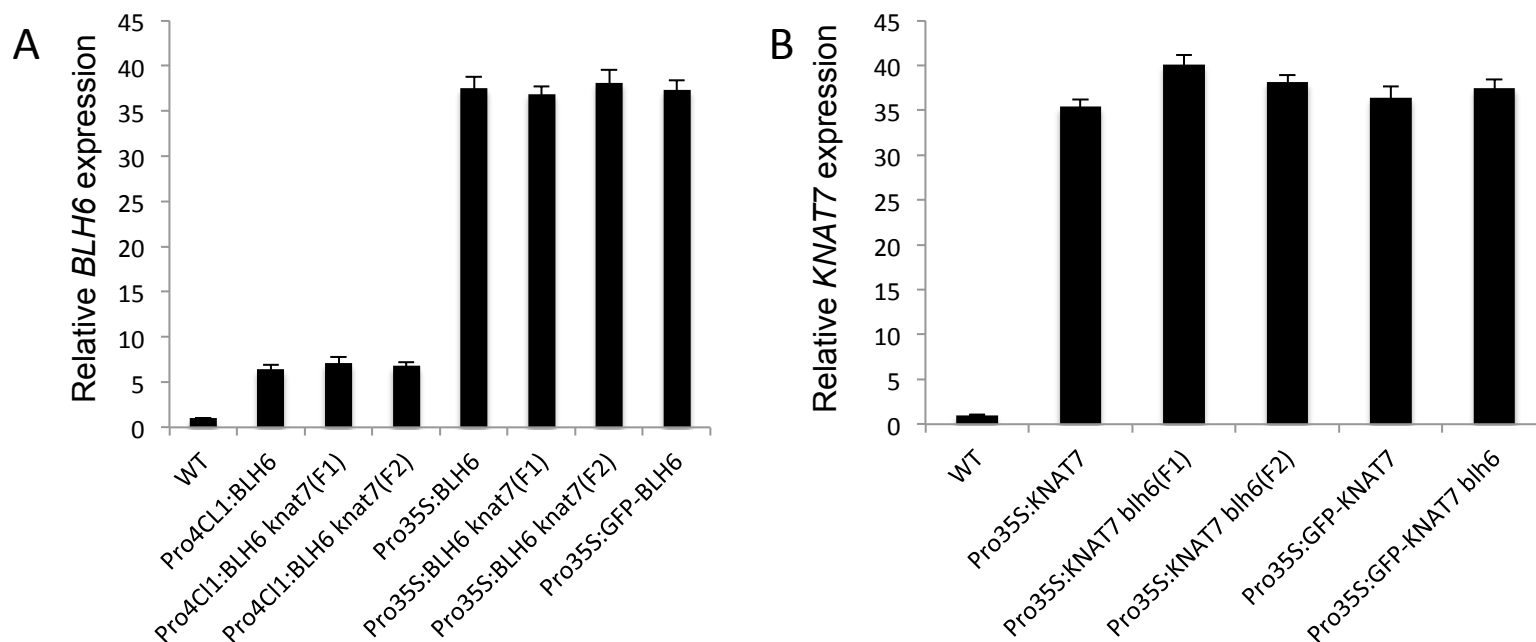

**Supplemental Figure 7.** Analysis of *BLH6* and *KNAT7* expression driven by *35S* or *4CL1* promoters in wild-type and *blh6* and *knat7* mutant backgrounds.

(A) Quantitative real-time PCR analysis of *BLH6* expression in representative wild-type (WT; Col-0), *Pro4CL1:BLH6*, *Pro4CL1:BLH6 knat7* (F1 and F2), *Pro35S:BLH6*, and *Pro35S:BLH6 knat7* (F1 and F2) lines.

(B) Quantitative real-time PCR analysis of *KNAT7* expression in representative wild-type (WT; Col-0), *Pro35S:KNAT7*, and *Pro35S:KNAT7 blh6* (F1 and F2) lines. Error bars represent the standard deviations, n=9 (three technical replicates from three biological replicates).

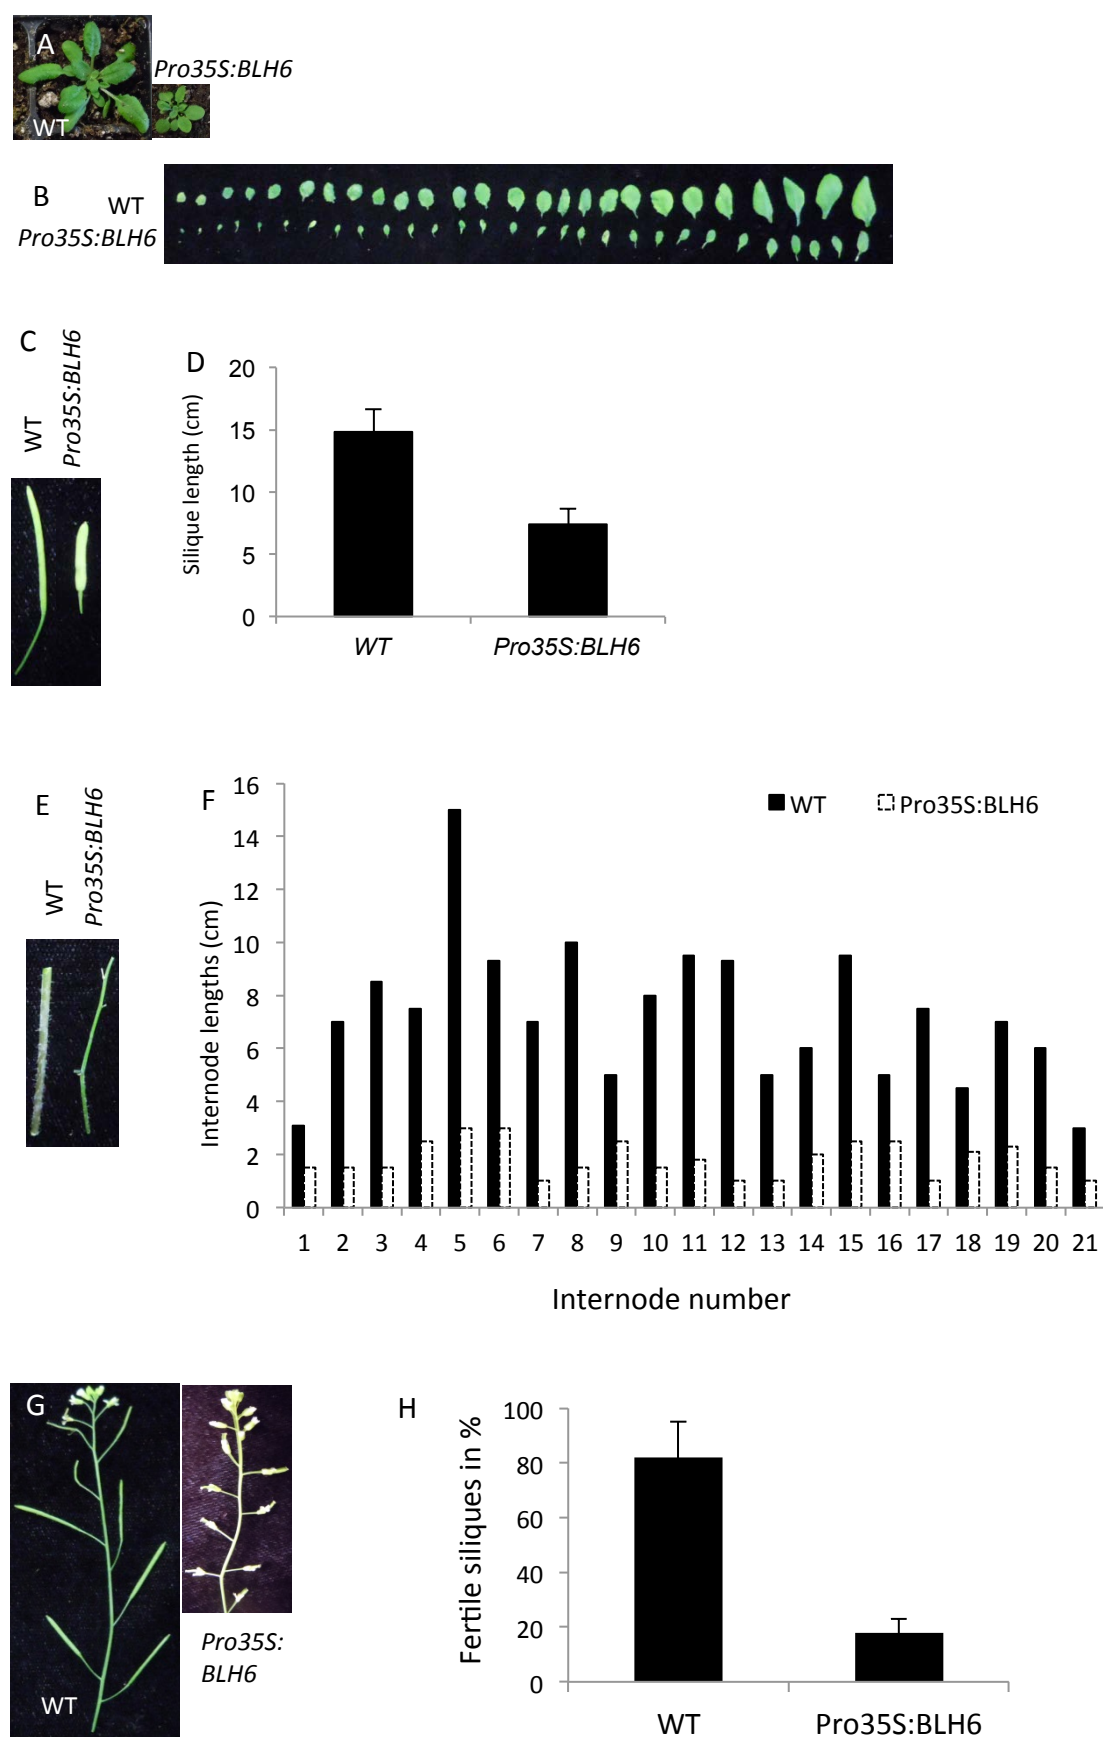

**Supplemental Figure 8.** Quantitative measurement of morphological differences between *Pro35S:BLH6* and wild type plants.

(A) Representative 2-week-old wild-type and *Pro35S:BLH6* plants.

(B) Rosette leaves of a representative 6-week-old WT and *Pro35S:BLH6* plants; leaf number is similar but *Pro35S:BLH6* leaves are much smaller.

(C) Mature siliques from wild-type and *Pro35S:BLH6* plants.

(D) Lengths of mature siliques from representative wild-type and *Pro35S:BLH6* plants. Error bars represent standard deviations of 30 replicates.

(E) Comparison of 6-week-old wild-type and *Pro35S:BLH6* inflorescence stems.

(F) Inflorescence stem internode lengths (node 1 defined as the node with the first silique). Solid bars, representative wild-type plant; Open bars, representative *Pro35S:BLH6* plant.

(G) Close-up view of the main stem of wild-type and *Pro35S:BLH6* plants.

(H) The percentage of fertile siliques per mature stem of wild type and *Pro35S:BLH6* plants.



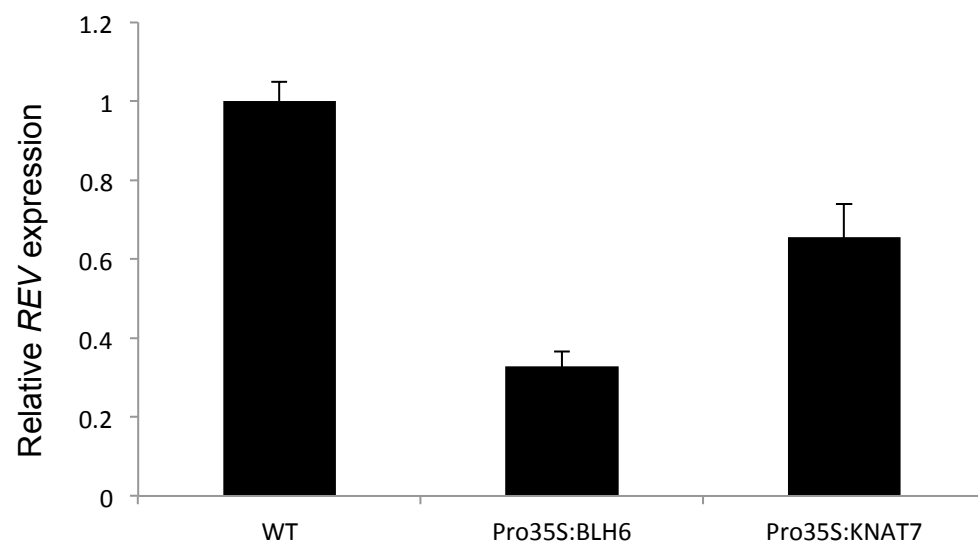

**Supplemental Figure 9.** *REV* expression is repressed in *BLH6* and *KNAT7* overexpression backgrounds<sup>9</sup>

Quantitative real-time PCR of *REV* expression in *Pro35S:BLH6* and *Pro35S:KNAT7*. Total RNA from three biological replicates (each consisting of pooled stems from four to six plants) was isolated from the whole stems of WT, *Pro35S:BLH6* and *Pro35S:KNAT7*. The expression level of *REV* in the WT background was set to unity. Error bars represent the standard deviations, n=9 technical replicates from three biological replicates.

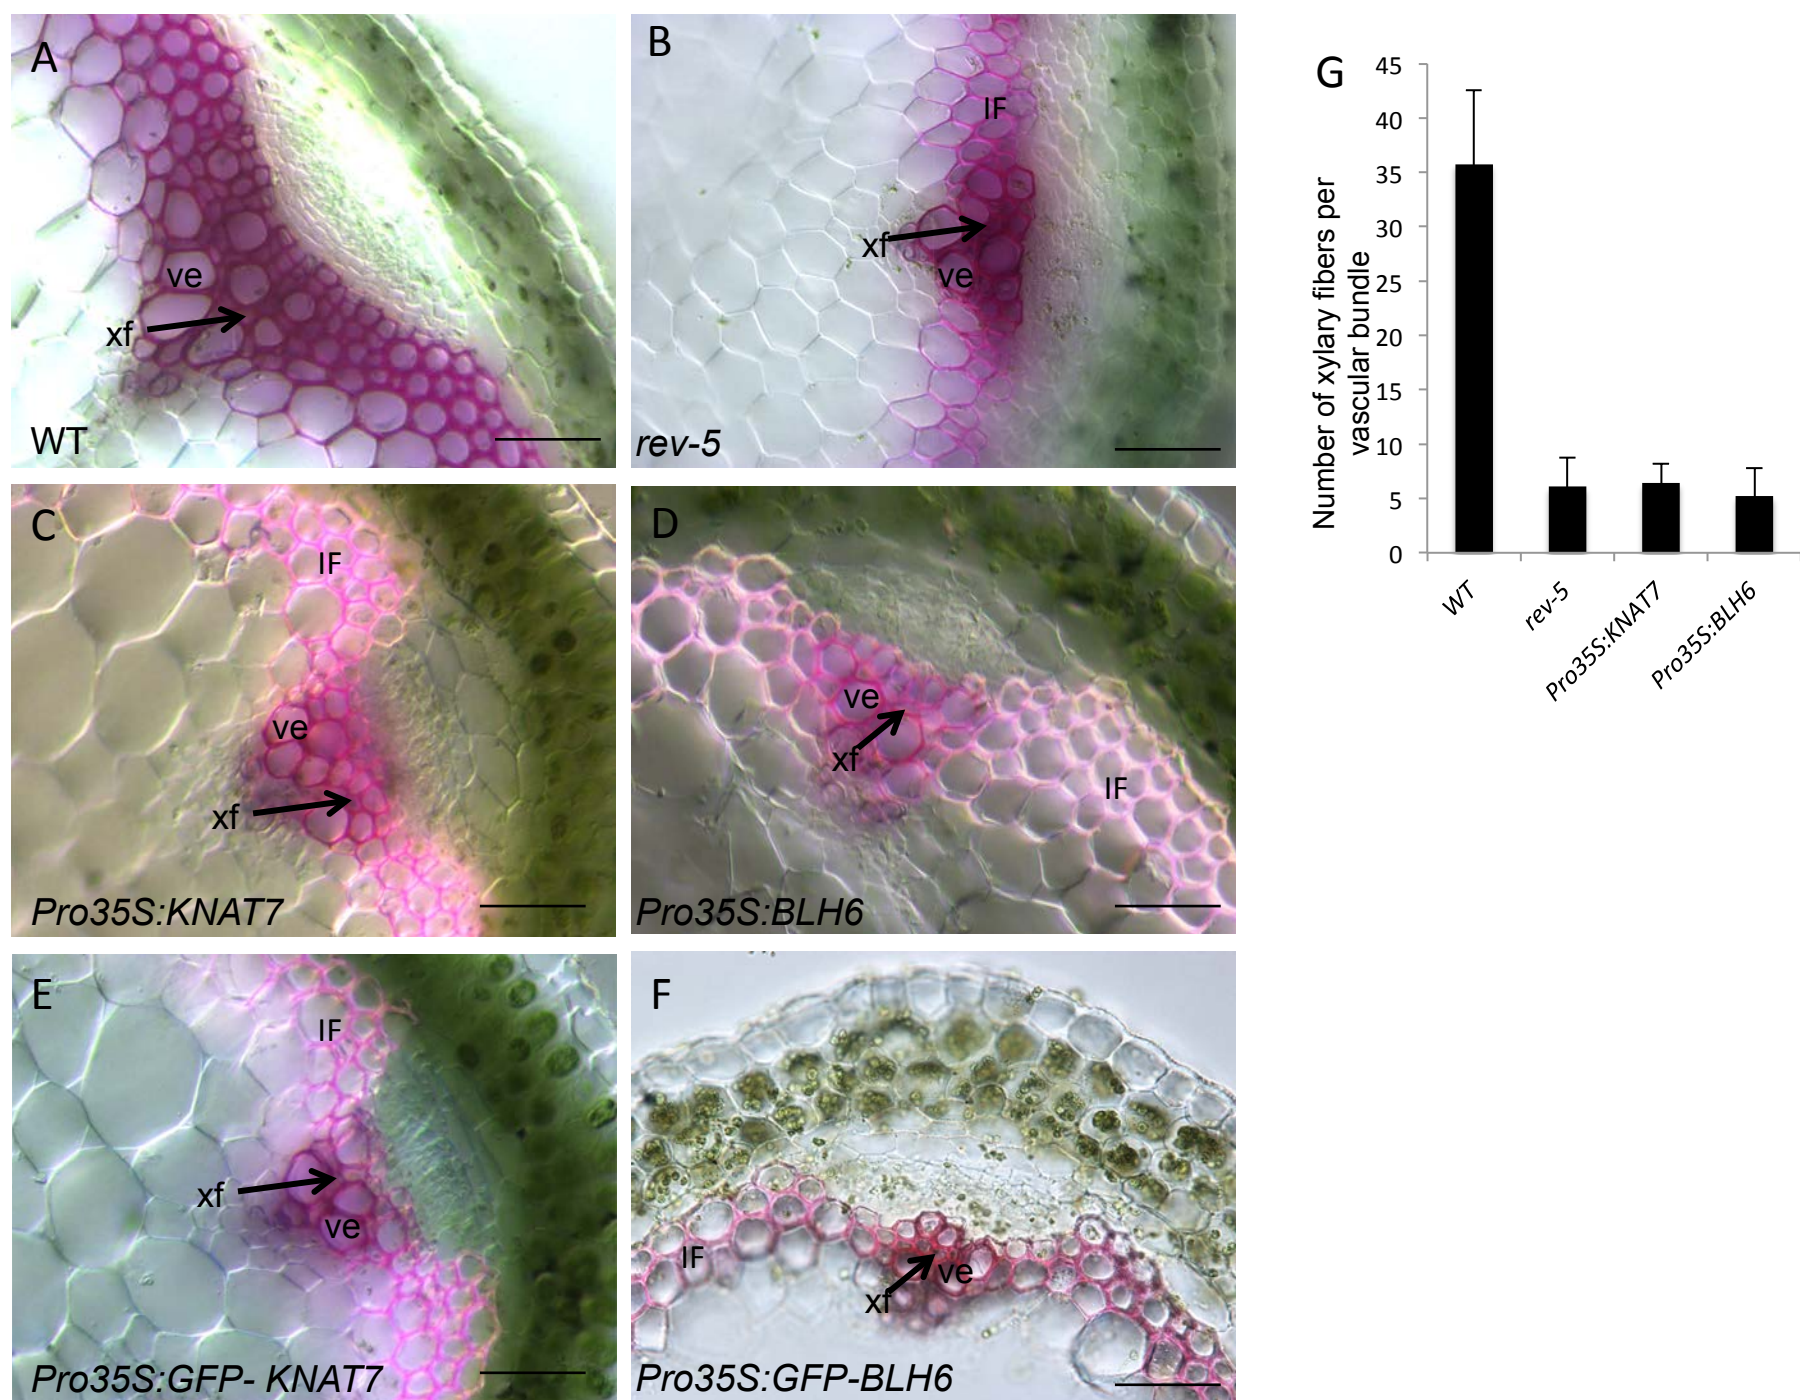

**Supplemental Figure 10.** The vascular bundles of plants expressing *Pro35S:KNAT7*, *Pro35S:GFP-KNAT7*, *Pro35S:BLH6*, and *Pro35S:GFP-BLH6* phenocopy those of the *rev-5* mutant.

Stem cross sections were taken from 3 cm of the bases of the inflorescence stems of 6-week old plants and stained with phloroglucinol and examined for alterations in anatomy and secondary wall thickness.

(A) Representative cross-sections from wild-type control stems stained with phloroglucinol.

(B) Representative cross-section from a *rev-5* showing thinner secondary cell wall of interfascicular fibers relative to wild-type.

(C) Representative cross-section from a *Pro35S:KNAT7* over-expression line showing fewer xylary fibers in the vascular bundle relative to wild-type.

(D) Representative cross-section from a *Pro35S:BLH6* over-expression line showing fewer xylary fibers in vascular bundles.

(E) Representative cross-section from a *Pro35S:GFP-KNAT7* over-expression line showing fewer xylary fibers in the vascular bundle and thinner secondary cell wall in IF relative to wild-type.

(F) Representative cross-section from a *Pro35S:GFP-BLH6* over-expression line showing fewer xylary fibers in the vascular bundle and thinner secondary cell wall in IF relative to wild-type.

(G) Measurements of xylary fiber cell numbers in the vascular bundles of *rev* and overexpression lines compared with the wild-type. Error bars represent the standard deviations,  $n=24$  vascular bundles.

ve, vessel; xf, xylary fibers; IF, interfascicular region. Bars, 50  $\mu\text{m}$ .

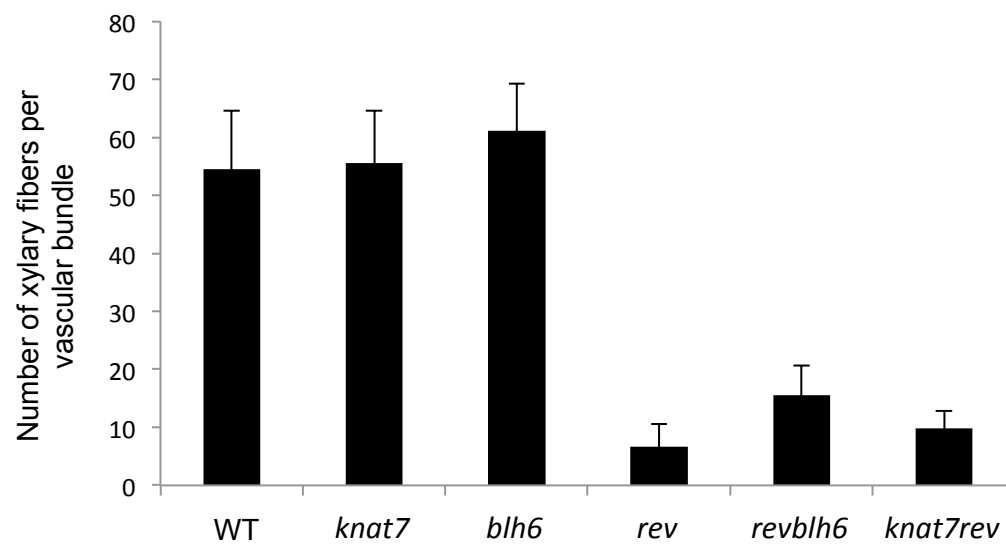

**Supplemental Figure 11.** Xylary fiber cell numbers in the vascular bundles of wild-type (Col-0), *rev*, *rev blh6* and *rev knat7* lines. Error bars represent the standard deviations, n = 24 vascular bundles per genotype.

**Supplemental Table 1.** Summary of Bimolecular Fluorescence Complementation (BiFC) assays with BLH candidates and KNAT7.

| N-EYFP fusion protein | C-EYFP fusion protein | Interaction result <sup>a</sup> |
|-----------------------|-----------------------|---------------------------------|
| KNAT7                 | ATH1                  | - <sup>b</sup>                  |
| KNAT7                 | BLH1                  | -                               |
| KNAT7                 | BLH7                  | -                               |
| KNAT7                 | BLH10                 | -                               |
| KNAT7                 | BLH5                  | -                               |
| KNAT7                 | BLH6                  | + <sup>c</sup>                  |
| ATH1                  | KNAT7                 | -                               |
| BLH1                  | KNAT7                 | -                               |
| BLH7                  | KNAT7                 | -                               |
| BLH10                 | KNAT7                 | -                               |
| BLH5                  | KNAT7                 | -                               |
| BLH6                  | KNAT7                 | +                               |
| Empty                 | BLH6                  | -                               |
| BLH6                  | Empty                 | -                               |

<sup>a</sup> To test for interaction, 12 independent transformations were performed for each combination, and at least 30 cells per combination were screened.

<sup>b</sup> -, no interactions detected.

<sup>c</sup> +, interactions detected. Signal was detected in 134 cells in total, in at least 11 cells per each transformation event.

**Supplemental Table 2.** Cell wall sugar composition in the lower stems of the wild type and mutant plants

|                          | Sugar amount <sup>1</sup> |           |          |           |            |            |          |
|--------------------------|---------------------------|-----------|----------|-----------|------------|------------|----------|
|                          | fructose                  | arabinose | rhamnose | galactose | glucose    | xylose     | mannose  |
| Wild-type                | 3.5±0.2 <sup>2</sup>      | 24.1±0.1  | 16.9±0.2 | 37.1±0.4  | 588.6±12.0 | 198.0±5.2  | 40.3±0.1 |
| <i>blh6</i>              | 3.4±0.2                   | 25.3±0.8  | 17.3±0.2 | 40.2±0.3  | 628.3±10.4 | 210.1±2.8  | 41.1±1.0 |
| <i>knat7</i>             | 3.2±0.3                   | 22.1±0.7  | 16.6±0.8 | 31.7±1.1  | 591.4±14.6 | 210.5±4.5  | 31.1±1.1 |
| <i>blh6 knat7</i>        | 3.3±0.1                   | 22.8±1.0  | 17.3±0.2 | 35.6±1.1  | 594.7±12.5 | 202.1±3.8  | 36.0±0.8 |
| <i>Pro4CL1:<br/>BLH6</i> | 3.5±0.0                   | 24.0±0.7  | 16.8±0.5 | 36.1±0.8  | 633.8±23.3 | 223.6±14.0 | 43.0±1.0 |

<sup>1</sup> Determined by HPLC; mg per 100 mg dry weight

<sup>2</sup> Standard deviation of measurements taken from three biological replicates

**Supplemental Table 3.** Interfascicular fiber cell wall thickness in wild-type, single mutant, *rev blh6*, and *rev knat7* plants

| Genotype         | Cell wall thickness <sup>1</sup> |
|------------------|----------------------------------|
| Wild-type        | 2.32±0.59                        |
| <i>blh6</i>      | 3.89±0.76 <sup>2</sup>           |
| <i>knat7</i>     | 3.77±0.93 <sup>2</sup>           |
| <i>rev</i>       | 1.09±0.29 <sup>2</sup>           |
| <i>rev blh6</i>  | 1.47±0.39 <sup>2,3</sup>         |
| <i>rev knat7</i> | 1.33±0.34 <sup>2,3</sup>         |

<sup>1</sup> Mean cell wall thickness in  $\mu\text{m} \pm \text{SD}$ ; n = 50 cells

<sup>2</sup> Significantly different from wild-type, p < 0.01

<sup>3</sup> Not significantly different from *rev*, p > 0.2



**Supplemental Table 4.** Primer sequences to generate truncated KNAT7, BLH6 and BLH7 clones for yeast two-hybrid assay.

| Constructs                                | Primers                                              |
|-------------------------------------------|------------------------------------------------------|
| ADH1:Gal4 AD-KNAT7                        | ATGCAAGAAGCGGCACTAGG<br>TTAGTGTTTGCCTTGGACTT         |
| ADH1:Gal4 AD-KNOX1                        | ATGCAAGAAGCGGCACTAGG<br>CTAAGCGTAAGAACGGAGAAG        |
| ADH1:Gal4 AD-KNOX2                        | ATGCGTTCTTACGCTTCCACG<br>TTACCCTTCTCCTAAAGTTGC       |
| ADH1:Gal4 AD-MEINOX                       | ATGCAAGAAGCGGCACTAGG<br>TTACCCTTCTCCTAAAGTTGC        |
| ADH1:Gal4 AD-ELK-Homeodomain              | ATGGAAAGAGTCAGACAAGAA<br>TTAGTGTTTGCCTTGGACTT        |
| ADH1:Gal4 DBD-BLH6                        | ATGGAGAATTATCCAGAAACACA<br>TCAAGCTACAAAATCATGTACCAA  |
| ADH1:Gal4 DBD-SKY                         | GAGAATTATCCAGAAACACAG<br>CTCTGCCTGAAACTGCTTTAG       |
| ADH1:Gal4 DBD-BELL                        | GGAGATAAAAACAATGAGTAAC<br>AGGTTGCATAAAACCTCTTTG      |
| ADH1:Gal4 DBD-MID (shorter)               | GATGTTGTGAGAACAATTCCC<br>TCCGGATATCGCATCCCTTAG       |
| ADH1:Gal4 DBD-MID (longer)                | GAGAATTATCCAGAAACACAG<br>AGGTTGCATAAAACCTCTTTG       |
| ADH1:Gal4 DBD-Homeodomain                 | CAAGCTTGGAGACCTCAACGC<br>TTCGGAAGACGAGTTGGAATC       |
| ADH1:Gal4 DBD-Homeodomain+<br>VSLTLGL box | CAAGCTTGGAGACCTCAACGC<br>AGCTACAAAATCATGTACCAA       |
| ADH1:Gal4 DBD-BLH7                        | ATGGCCACTTATTACAAAACCTGG<br>TCAAGCTACAAAATCATGCAACAA |

**Supplemental Table 5.** Primers used for quantitative RT-PCR gene expression and Chromatin Immunoprecipitation analysis.

| Gene ID   | Name     | Primer sequence (5'-3')            |
|-----------|----------|------------------------------------|
| At2g37040 | PAL1     | PAL1-L: AAGATTGGAGCTTTCGAGGA       |
|           |          | PAL1-R: TCTGTTCCAAGCTCTTCCCT       |
| At3g53260 | PAL2     | PAL2-L: GAGGCAGCGTTAAGGTTGAG       |
|           |          | PAL2-R: TTCTCGGTTAGCGATTCACC       |
| At3g10340 | PAL4     | PAL4-L: GGGAAACCGGAGTTTACAGA       |
|           |          | PAL4-R: AGAGGATCCATTTTCGTGGAG      |
| At2g30490 | C4H      | C4H-L: ACTGGCTTCAAGTCGGAGAT        |
|           |          | C4H-R: ACACGACGTTTCTCGTTCTG        |
| At1g51680 | 4CL1     | 4CL1-L: TCAACCCGGTGAGATTTGTA       |
|           |          | 4CL1-R: TCGTCATCGATCAATCCAAT       |
| At5g48930 | HCT      | HCT-L: GCCTGCACCAAGTATGAAGA        |
|           |          | HCT-R: GACAGTGTTCCCATCCTCCT        |
| At2g40890 | C3H1     | C3H1-L: GTTGGACTTGACCGGATCTT       |
|           |          | C3H1-R: ATTAGAGGCGTTGGAGGATG       |
| At4g34050 | CCoAOMT1 | CCoAOMT1-L: CTCAGGGAAGTGACAGCAAA   |
|           |          | CCoAOMT1-R: GTGGCGAGAAGAGAGTAGCC   |
| At1g15950 | CCR1     | CCR1-L: GTGCAAAGCAGATCTTCAGG       |
|           |          | CCR1-R: GCCGCAGCATTAATTACAAA       |
| At4g36220 | F5H1     | F5H-L: CTTCAACGTAGCGGATTTCA        |
|           |          | F5H-R: AGATCATTACGGGCCTTCAC        |
| At5g54160 | COMT1    | COMT1-L: TTCCATTGCTGCTCTTTGTC      |
|           |          | COMT1-R: CATGGTGATTGTGGAATGGT      |
| At4g34230 | CAD5     | CAD5-L: TTGGCTGATTCGTTGGATTA       |
|           |          | CAD5-R: ATCACTTTCCTCCCAAGCAT       |
| AT2G38080 | LAC4     | LAC4-L: GGTGGATGGGTCGTCATGGAGTTC   |
|           |          | LAC4-R: CGTGGCGTGATGTTGATATGTAGCGC |
| At4g32410 | CesA1    | CesA1-L: GGTATTTATTGCGGCAACCT      |
|           |          | CesA1-R: ATCCAACCAATCTCTTTGCC      |
| At5g05170 | CesA3    | CesA3-L: ACAGCCAACACAGTGCTCTC      |
|           |          | CesA3-R: TGGTACCCATTTACGAGCAA      |
| At2g21770 | CesA6    | CesA6-L: TGCCCTTGAGCACATAGAAG      |
|           |          | CesA6-R: GCACTCCACCATTTAGCAGA      |
| At5g44030 | CesA4    | CesA4-L: GGATCAGCTCCGATCAATT       |
|           |          | CesA4-R: ACCACAAAGGACAATGACGA      |
| At5g17420 | CesA7    | CesA7-L: CAGGCGTACTCACAAATGCT      |
|           |          | CesA7-R: TGTCAATGCCATCAAACCTT      |
| At4g18780 | CesA8    | CesA8-L: ACGGAGAGTTCTTTGTGGCT      |
|           |          | CesA8-R: GGTCTGTGTTGGAACAATGG      |
| At5g54690 | IRX8     | IRX8-L: GTGGTCACAGGGAAAGGATT       |
|           |          | IRX8-R: AGCAAGAGAGGAGCAAGGAG       |
| At2g37090 | IRX9     | IRX9-L: TTTGCGGGACTAAACAACAT       |

|           |        |                                       |
|-----------|--------|---------------------------------------|
| At2g37090 | IRX9   | IRX9-L: TTTGCGGGACTAAACAACAT          |
|           |        | IRX9-R: ATCGGAGGCTTTGTCTCTGT          |
| At1g27440 | IRX10  | IRX10-L:AATTGGCCTTATTGGAATCG          |
|           |        | IRX10-R: TTCGTCCAAACAGACATGG          |
| At2g28110 | FRA8   | FRA8-L: GACTTGTTGAATCGGTGGCTC         |
|           |        | FRA8-R: GAAAGAGTTTGACCTTCTAAC         |
| AT1G27600 | IRX9L  | IRX9L-L: CCGCCAAGTACACACAGTGA         |
|           |        | IRX9L-R: AGCCTGCAGATTCTTTTGGGA        |
| At5g60690 | REV    | REV-L: CCAAGCTGTGAATCTGTGGTC          |
|           |        | REV-R: CGATCTTTGAGGATCTCTGCA          |
|           |        | ProREV1-L: TACGACGGACTTTCCGAAGA       |
|           |        | ProREV1-R: ACTGCTTCTCTCACGGTGGT       |
|           |        | ProREV2-L: TCCTTCTTCACTTTCTCACATAACC  |
|           |        | ProREV2-R: TGAAGGACACAGAAACCTTAGGA    |
|           |        | ProREV3-L: AAAAACACATCAACAGAGTAAAAACA |
|           |        | ProREV3-R: TGATATCAGCCAATCACAACA      |
|           |        | ProREV4-L: TTACAAGCACAGCTTCAATAGCA    |
|           |        | ProREV4-R: AAAAATGAAGTTATGCACGGGTA    |
|           |        | ProREV5-L: TTCACTCAAGGTCCTACTCTTTGA   |
|           |        | ProREV5-R: TTCTCTCACTATCCCTTTGTGG     |
| AT3G18780 | ACTIN2 | ACTIN2-L: CCTGAAAGGAAGTACAGTG         |
|           |        | ACTIN2-R: CTGTGAACGATTCCTGGAC         |
|           |        | ProACTIN2-L: TGTCGTACGTTGAACAGAAAGC   |
|           |        | ProACTIN2-R: CCGGTACCATTGTCACACAC     |
